# Supplementary material
Source: PubMed Central journal article supplement (PMC2148320)
Supplement: pnas_0709443104_3.pdf [file pnas_0709443104_3.pdf]

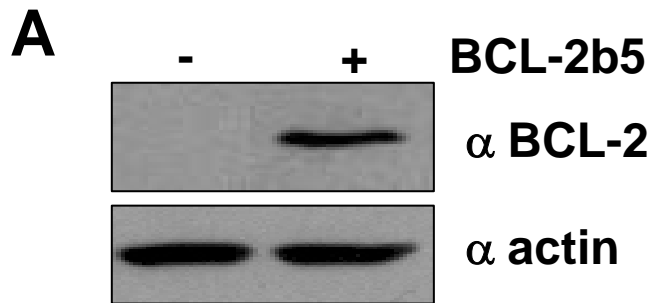

**B**

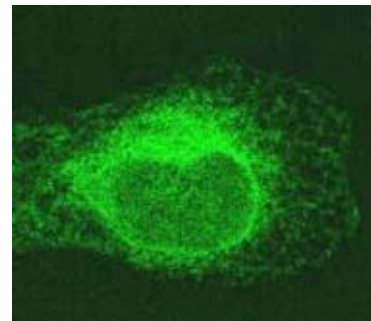

**BCL-2b5**

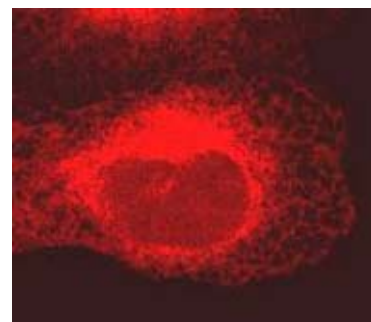

**BAP31**

**C**

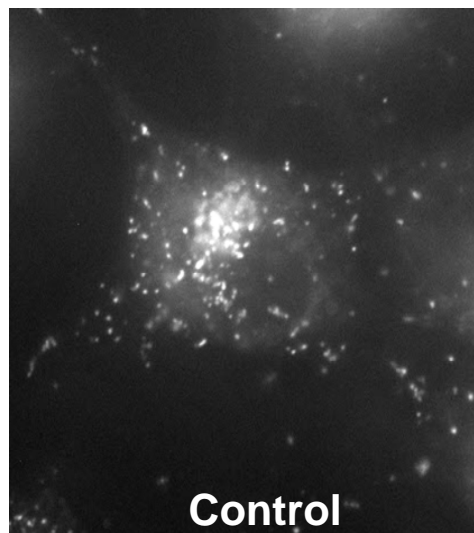

**Control**

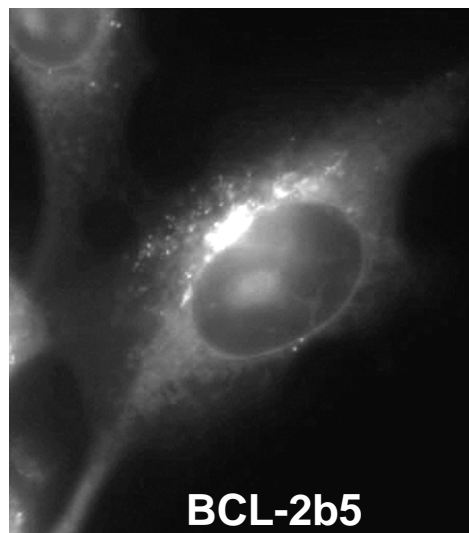

**BCL-2b5**

**Obatoclox**
