# Supplementary material
Source: PubMed Central journal article supplement (PMC2148320)
Supplement: pnas_0709443104_5.pdf [file pnas_0709443104_5.pdf]

**A**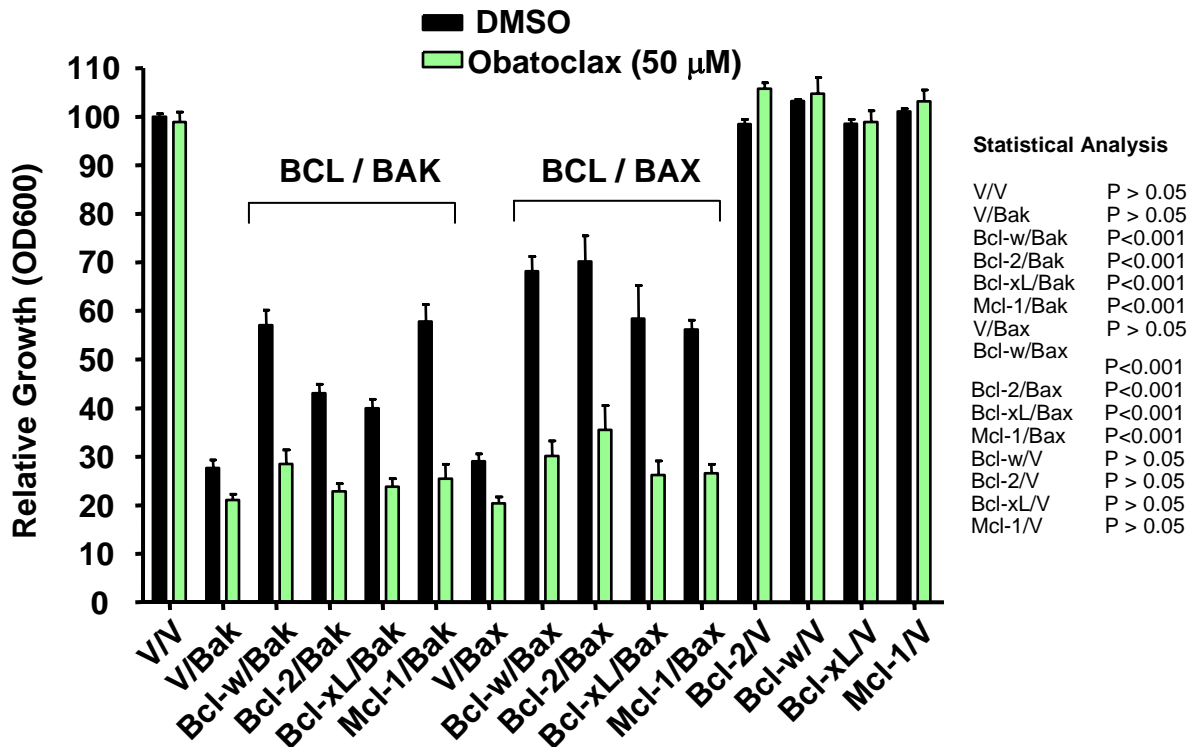**B**

| Drug         | Yeast IC <sub>50</sub> | Mammalian Cell IC <sub>50</sub> |
|--------------|------------------------|---------------------------------|
| Camptothecin | >200 $\mu$ M           | ~100 nM                         |
| Doxorubicin  | ~10-30 $\mu$ M         | ~10-100 nM                      |
