# Supplementary material
Source: PubMed Central journal article supplement (PMC2148320)
Supplement: pnas_0709443104_6.pdf [file pnas_0709443104_6.pdf]

**A**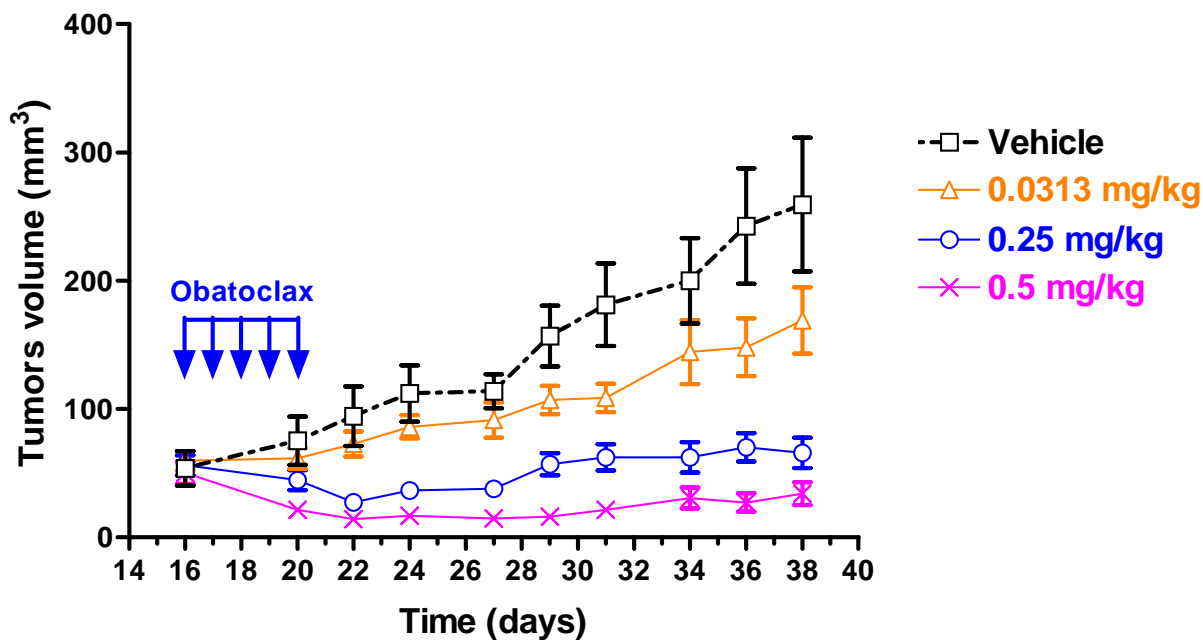**B**

| Tumor Cells               | Mouse Strain   | Treatment |              |       |               |     |
|---------------------------|----------------|-----------|--------------|-------|---------------|-----|
|                           |                | Drug      | Dose (mg/kg) | Death | Weight Change | T/C |
| Cervical carcinoma (C33A) | CB17 SCID/SCID | Cisplatin | 3.5          | 0/10  | -18%          | 38% |
|                           |                | Obatoclox | 2            | 0/10  | 7%            | 11% |
| Prostate carcinoma (PC3)  | CB17 SCID/SCID | Cisplatin | 3.5          | 2/10  | -18%          | 15% |
|                           |                | Obatoclox | 2            | 0/10  | 10%           | 28% |
| Colon Carcinoma (SW480)   | CB17 SCID/SCID | Cisplatin | 3.5          | 2/10  | -23%          | 75% |
|                           |                | Obatoclox | 2            | 0/10  | 3%            | 35% |
| Mammary carcinoma (4T1)   | Balb/c regular | Cisplatin | 3.5          | 0/10  | -1%           | 55% |
|                           |                | Obatoclox | 2            | 0/10  | 1%            | 42% |
