# Supplementary material
Source: PubMed Central journal article supplement (PMC2148320)
Supplement: pnas_0709443104_7.pdf [file pnas_0709443104_7.pdf]

**Table 1. Molecular structures and experimentally derived  $pK_i$ s ( $\log K_i$ ) were obtained from the literature cited below**

| Structure                                                                           | Name                  | $pK_i$ | $pK_i$<br>(calc.) | Reference |
|-------------------------------------------------------------------------------------|-----------------------|--------|-------------------|-----------|
| 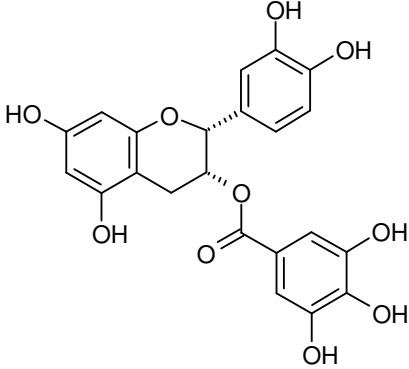   | Catechin gallate      | -6.64  | -6.88             | 1         |
|   | Gallocatechin gallate | -6.63  | -7.29             | 1         |
|  | Theaflavin            | -6.16  | -7.03             | 1         |
|  | Epicatechin           | >-4    | -5.46             | 1         |

| Structure                                                                           | Name                     | p <i>K</i> <sub>i</sub> | p <i>K</i> <sub>i</sub><br>(calc.) | Reference |
|-------------------------------------------------------------------------------------|--------------------------|-------------------------|------------------------------------|-----------|
| 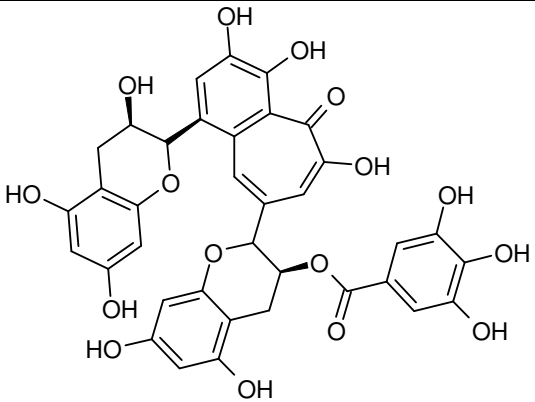   | Theaflavin-3'<br>gallate | -5.91                   | -6.20                              | 1         |
|   | Theaflavin<br>digallate  | >-4                     | -6.67                              | 1         |
|  | Gallocatechin            | >-4                     | -5.49                              | 1         |
|  | Catechin                 | >-4                     | -5.55                              | 1         |

| Structure | Name         | $pK_i$    | $pK_i$ (calc.) | Reference |
|-----------|--------------|-----------|----------------|-----------|
|           | Gossypol     | -6.33     | -5.77          | 3         |
|           | ABT-737      | $\leq -9$ | -9.70          | 4         |
|           | YC137        | -5.89     | -6.48          | 2         |
|           | Antimycin A3 | -6.08     | -6.84          | 5         |

Calculated  $pK_i$ s ( $pK_i$  calc.) were derived as outlined under *Materials and Methods*.

1 . Leone M, Zhai D, Sareth S, Kitada S, Reed JC, Pellecchia M (2003) *Cancer Res* 63:8118-8121.

2. Real PJ, Cao Y, Wang R, Nikolovska-Coleska Z, Sanz-Ortiz J, Wang S, Fernandez-Luna JL (2004) *Cancer Res* 64:7947-7953.

3. Mohammad RM, Wang S, Aboukameel A, Chen B, Wu X, Chen J, Al-Katib A (2005) *Mol Cancer Ther* 4:13-21
4. Oltersdorf T, Elmore SW, Shoemaker AR, Armstrong RC, Augeri DJ, Belli BA, Bruncko M, Deckwerth TL, Dinges J, Hajduk PJ, *et al.* (2005) *Nature*. 435:677-681.
5. Kim KM, Giedt CD, Basanez G, O'Neill JW, Hill JJ, Han YH, Tzung SP, Zimmerberg J, Hockenbery DM, Zhang KY (2001) *Biochemistry*. 40:4911-4922.
